# Supplementary material for: From Bricks to Babies: Housing Stock as a Determinant of Fertility
Source: Research Square preprint supplement (doi:10.21203/rs.3.rs-6557865/v1), 2025-06-05
Supplement: Supplementary file 1 [file cc9e5ec290abfd4c9d9949cf.docx]

**FROM BRICKS TO BABIES: HOUSING STOCK AS A DETERMINANT OF FERTILITY**

**ONLINE APPENDIX**

**Appendix A: Recursive simulation of a one-time change in gHousing over the 1-to-5-year fertility rates**

Departing from equation (21), and assuming a third order differential equation, as well as for , the impulse-response function of changing present () growth rates of housing stock over logarithmic fertility rates equals

|  | (A1) |
| --- | --- |

The impact over equals

|  | (A2) |
| --- | --- |

For

|  | (A3) |
| --- | --- |

For

|  | (A4) |
| --- | --- |

For

|  | (A5) |
| --- | --- |

**Appendix B: The importance of including equilibrium prices to deal with omitted variable biases**

From equation (11) and (19) we know that equilibrium discounted prices of housing equal

|  | (B1) |
| --- | --- |

A log-linear approximation of (B1) can be set as

|  | (B2) |
| --- | --- |

Similarly, the log-linear approximation of fertility rates can also be set as

|  | (B3) |
| --- | --- |

With and as non-systematic errors. Then, (B3) is a function of the average production costs of housing .

Since our observation on housing prices is the actual equilibrium price of (B2), we can use (B2) in (B3) to partially deal with the problem of omitted variable bias associated with unobserved production costs in the housing market. That is

|  | (B4) |
| --- | --- |
